# Supplementary material
Source: MDPI journal article supplement (https://www.mdpi.com/2073-445X/12/1/181)
Supplement: s1 [file s1]

| Dimension        | Acronym    | Type        | Variable    | Driving force              | Scenarios           | Data   | Unit        | Description                                                                              | Source                                                                           |
|------------------|------------|-------------|-------------|----------------------------|---------------------|--------|-------------|------------------------------------------------------------------------------------------|----------------------------------------------------------------------------------|
| Physical/natural | uso18XR    | categorical | dependent   | Land use and land cover    | Do nothing (action) | 2018   | class       | Land use and land cover classes                                                          | MapBiomas                                                                        |
| Physical/natural | AreaNat    | categorical | dependent   | Land use and land cover    | AreaNat (action)    | Action | class       | Land use and land cover (2018) with the action of natural areas rehabilitation           | MapBiomas                                                                        |
| Physical/natural | uso00XR    | categorical | independent | Land use and land cover    | BAU, OT, PT         | 2000   | class       | Land use and land cover classes                                                          | MapBiomas                                                                        |
| Physical/natural | temp       | scalar      | independent | Temperature                | BAU, OT             | 2002   | °C          | Average air temperature                                                                  | Center for Environmental Resources Information and Hydrometeorology-Epagri/Ciram |
| Physical/natural | tempPT     | scalar      | independent | Temperature                | PT                  | *2036  | °C          | Increase in average air temperature by 4°C                                               | Center for Environmental Resources Information and Hydrometeorology-Epagri/Ciram |
| Physical/natural | precip     | scalar      | independent | Accumulated precipitation  | BAU, OT             | 2002   | mm          | Accumulated precipitation                                                                | Center for Environmental Resources Information and Hydrometeorology-Epagri/Ciram |
| Physical/natural | precipPT   | scalar      | independent | Accumulated precipitation  | PT                  | *2036  | mm          | Increase in accumulated precipitation by 84mm                                            | Center for Environmental Resources Information and Hydrometeorology-Epagri/Ciram |
| Physical/natural | solos      | categorical | independent | Type of soil               | BAU, OT, PT         | 2004   | classes     | Soil typology                                                                            | Embrapa                                                                          |
| Physical/natural | tpi        | categorical | independent | Type of relief             | BAU, OT, PT         | 2000   | classes     | Physiographic classes                                                                    | SRTM                                                                             |
| Physical/natural | mde        | scalar      | independent | Altitude                   | BAU, OT, PT         | 2000   | mm          | Elevations                                                                               | SRTM                                                                             |
| Physical/natural | estrad_osm | scalar      | independent | Road network               | BAU, OT, PT         | 2018   | km/km2      | Road density                                                                             | OSM/IBGE                                                                         |
| Economic         | agrov_06   | scalar      | independent | Rural agribusiness         | BAU                 | 2006   | %           | Percentage of family farming participation in the value of rural agribusiness production | Agricultural Census/IBGE                                                         |
| Economic         | agrov_17   | scalar      | independent | Rural agribusiness         | BAU, OT, PT         | 2017   | %           | Percentage of family farming participation in the value of rural agribusiness production | Agricultural Census/IBGE                                                         |
| Economic         | agrovOT    | scalar      | independent | Rural agribusiness         | OT                  | *2036  | %           | 55% increase in the participation of family agriculture in rural agribusiness (2017)     | Agricultural Census/IBGE                                                         |
| Economic         | agrovPT    | scalar      | independent | Rural agribusiness         | PT                  | *2036  | %           | 18% increase in the participation of family agriculture in rural agribusiness (2017)     | Agricultural Census/IBGE                                                         |
| Economic         | efetb_00   | scalar      | independent | Cattle herd                | BAU, OT, PT         | 2000   | %           | Of cattle in the total herd                                                              | Municipal Livestock Survey-PPM/IBGE                                              |
| Economic         | efetb_18   | scalar      | independent | Cattle herd                | BAU, OT, PT         | 2018   | %           | Of cattle in the total herd                                                              | Municipal Livestock Survey-PPM/IBGE                                              |
| Economic         | efets_00   | scalar      | independent | Swine Herd                 | BAU, OT, PT         | 2000   | %           | Swine in the total herd                                                                  | Municipal Livestock Survey-PPM/IBGE                                              |
| Economic         | efets_18   | scalar      | independent | Swine Herd                 | BAU, OT, PT         | 2018   | %           | Swine in the total herd                                                                  | Municipal Livestock Survey-PPM/IBGE                                              |
| Economic         | efetg_00   | scalar      | independent | Chicken Herd               | BAU, OT, PT         | 2000   | %           | Chicken in the total herd                                                                | Municipal Livestock Survey-PPM/IBGE                                              |
| Economic         | efetg_18   | scalar      | independent | Chicken Herd               | BAU, OT, PT         | 2018   | %           | Chicken in the total herd                                                                | Municipal Livestock Survey-PPM/IBGE                                              |
| Economic         | empco_06   | scalar      | independent | Formal employment—commerce | BAU, OT, PT         | 2006   | individuals | Formal employees in commerce                                                             | Annual Social Information Report - RAIS/Ministry of Economy                      |
| Economic         | empco_18   | scalar      | independent | Formal employment—commerce | BAU, OT, PT         | 2018   | individuals | Formal employees in commerce                                                             | Annual Social Information Report - RAIS/Ministry of Economy                      |
| Economic         | empin_06   | scalar      | independent | Formal employment—industry | BAU, OT, PT         | 2006   | individuals | Formal employees in industry                                                             | Annual Social Information Report - RAIS/Ministry of Economy                      |

|               |          |        |             |                                                     |             |       |                |                                                                                             |                                                                |
|---------------|----------|--------|-------------|-----------------------------------------------------|-------------|-------|----------------|---------------------------------------------------------------------------------------------|----------------------------------------------------------------|
| Economic      | empin_18 | scalar | independent | Formal employment—industry                          | BAU, OT, PT | 2018  | individuals    | Formal employees in industry                                                                | Annual Social Information Report - RAIS/Ministry of Economy    |
| Economic      | empag_06 | scalar | independent | Formal employment—agriculture                       | BAU, OT, PT | 2006  | individuals    | Formal employees in agriculture                                                             | Annual Social Information Report - RAIS/Ministry of Economy    |
| Economic      | empag_18 | scalar | independent | Formal employment—agriculture                       | BAU, OT, PT | 2018  | individuals    | Formal employees in agriculture                                                             | Annual Social Information Report - RAIS/Ministry of Economy    |
| Economic      | fipro_06 | scalar | independent | Financing—Pronaf                                    | BAU,PT      | 2006  | %              | Of the establishments with financing, percentage of those that received PRONAF**            | Agricultural Census/IBGE                                       |
| Economic      | fipro_17 | scalar | independent | Financing—Pronaf                                    | BAU,OT, PT  | 2017  | %              | Of the establishments with financing, percentage of those that received PRONAF**            | Agricultural Census/IBGE                                       |
| Economic      | fiproOT  | scalar | independent | Financing—Pronaf                                    | OT          | *2036 | %              | Increase of 0.3% in the number of agricultural establishments with Pronaf financing (2017)  | Agricultural Census/IBGE                                       |
| Economic      | indge_06 | scalar | independent | Processing industries                               | BAU,OT, PT  | 2006  | unit           | Processing industries                                                                       | Annual Social Information Report - RAIS/Ministry of Economy    |
| Economic      | indge_18 | scalar | independent | Processing industries                               | BAU,OT, PT  | 2018  | unit           | Processing industries                                                                       | Annual Social Information Report - RAIS/Ministry of Economy    |
| Economic      | pibca_02 | scalar | independent | Gross Domestic Product—GDP                          | BAU         | 2002  | R\$            | GDP per capita (relation between the GDP and the municipality's population)                 | Gross Domestic Product of the Municipality/IBGE                |
| Economic      | pibca_17 | scalar | independent | Gross Domestic Product—GDP                          | BAU,OT, PT  | 2017  | R\$            | GDP per capita (relation between the GDP and the municipality's population)                 | Gross Domestic Product of the Municipality/IBGE                |
| Economic      | pibcaOT  | scalar | independent | Gross Domestic Product—GDP                          | OT          | *2036 | R\$            | 54% increase in GDP per capita (2017)                                                       | Gross Domestic Product of the Municipality/IBGE                |
| Economic      | pibcaPT  | scalar | independent | Gross Domestic Product—GDP                          | PT          | *2036 | R\$            | 13.5% increase in GDP per capita (2017)                                                     | Gross Domestic Product of the Municipality/IBGE                |
| Economic      | terra_00 | scalar | independent | Agricultural land price                             | BAU,OT, PT  | 2000  | R\$/h          | Most common value of hectare of land in the category: Prime land                            | Center of Socioeconomics and Agricultural Planning-Epagri/Cepa |
| Economic      | terra_18 | scalar | independent | Agricultural land price                             | BAU,OT, PT  | 2018  | R\$/h          | Most common value of hectare of land in the category: Prime land                            | Center of Socioeconomics and Agricultural Planning-Epagri/Cepa |
| Economic      | renda_00 | scalar | independent | Per capita income                                   | BAU,OT, PT  | 2000  | R\$            | Ratio of the sum of the income of all the individuals in the family and the total number    | Demographic Census/IBGE                                        |
| Economic      | renda_10 | scalar | independent | Per capita income                                   | BAU,OT, PT  | 2010  | R\$            | Ratio of the sum of the income of all the individuals in the family and the total number    | Demographic Census/IBGE                                        |
| Economic      | mad_00   | scalar | independent | Log Production                                      | BAU,OT, PT  | 2000  | m <sup>3</sup> | Amount of log produced                                                                      | Production of Vegetable Extraction and Forestry-PEVS/IBGE      |
| Economic      | mad_18   | scalar | independent | Log Production                                      | BAU,OT, PT  | 2018  | m <sup>3</sup> | Amount of log produced                                                                      | Production of Vegetable Extraction and Forestry-PEVS/IBGE      |
| Economic      | vabag_00 | scalar | independent | Gross value added of agriculture and cattle raising | BAU,OT, PT  | 2000  | %              | Participation of the gross value added (GVA) of agriculture and cattle-raising in the total | Gross Domestic Product of the Municipality/IBGE                |
| Economic      | vabag_17 | scalar | independent | Gross value added of agriculture and cattle raising | BAU,OT, PT  | 2017  | %              | Participation of the gross value added (GVA) of agriculture and cattle-raising in the total | Gross Domestic Product of the Municipality/IBGE                |
| Economic      | vllei_00 | scalar | independent | Milk production value                               | BAU,OT, PT  | 2000  | %              | Value of milk production as a function of total farming GVA                                 | Municipal Livestock Survey-PPM/IBGE                            |
| Economic      | vllei_17 | scalar | independent | Milk production value                               | BAU,OT, PT  | 2017  | %              | Value of milk production as a function of total farming GVA                                 | Municipal Livestock Survey-PPM/IBGE                            |
| Sociocultural | agrif_06 | scalar | independent | Family agriculture                                  | BAU,OT, PT  | 2006  | %              | Rural establishments with family farming typology                                           | Agricultural Census/IBGE                                       |
| Sociocultural | agrif_17 | scalar | independent | Family agriculture                                  | BAU,OT, PT  | 2017  | %              | Rural establishments with family farming typology                                           | Agricultural Census/IBGE                                       |
| Sociocultural | escps_06 | scalar | independent | Schooling of the head farmer                        | BAU,OT, PT  | 2006  | individuals    | Head farmers with higher education                                                          | Agricultural Census/IBGE                                       |

|               |          |        |             |                                     |            |       |             |                                                                                         |                                            |
|---------------|----------|--------|-------------|-------------------------------------|------------|-------|-------------|-----------------------------------------------------------------------------------------|--------------------------------------------|
| Sociocultural | escps_17 | scalar | independent | Schooling of the head farmer        | BAU,OT, PT | 2017  | individuals | Head farmers with higher education                                                      | Agricultural Census/IBGE                   |
| Sociocultural | idadp_06 | scalar | independent | Age of the head farmer              | BAU, OT    | 2006  | individuals | Head farmers 55 years of age or older                                                   | Agricultural Census/IBGE                   |
| Sociocultural | idadp_17 | scalar | independent | Age of the head farmer              | BAU,OT, PT | 2017  | individuals | Head farmers 55 years of age or older                                                   | Agricultural Census/IBGE                   |
| Sociocultural | idadpPT  | scalar | independent | Age of the head farmer              | PT         | 2036* | individuals | 70% increase in the number of head farmers 55 years of age or older                     | Agricultural Census/IBGE                   |
| Sociocultural | idhm_00  | scalar | independent | Human Development Index—HDI         | BAU,OT, PT | 2000  | index       | Municipal human development index                                                       | Atlas of Human Development of Brazil/PNUD  |
| Sociocultural | idhm_10  | scalar | independent | Human Development Index—HDI         | BAU,OT, PT | 2010  | index       | Municipal human development index                                                       | Atlas of Human Development of Brazil/PNUD  |
| Sociocultural | trabp_06 | scalar | independent | Rural workers                       | BAU,OT, PT | 2006  | individuals | Rural workers linked to the head farmer                                                 | Agricultural Census/IBGE                   |
| Sociocultural | trabp_17 | scalar | independent | Rural workers                       | BAU,OT, PT | 2017  | individuals | Rural workers linked to the head farmer                                                 | Agricultural Census/IBGE                   |
| Sociocultural | arees_06 | scalar | independent | Land structure                      | BAU,OT, PT | 2006  | ha          | Average area of rural establishments: total occupied area (ha)/number of establishments | Agricultural Census/IBGE                   |
| Sociocultural | arees_17 | scalar | independent | Land structure                      | BAU,OT, PT | 2017  | ha          | Average area of rural establishments: total occupied area (ha)/number of establishments | Agricultural Census/IBGE                   |
| Technology    | renmi_02 | scalar | independent | Maize yield                         | BAU        | 2002  | kg/ha       | Average maize yield                                                                     | Municipal agricultural production-PAM/IBGE |
| Technology    | renmi_17 | scalar | independent | Maize yield                         | BAU,OT, PT | 2017  | kg/ha       | Average maize yield                                                                     | Municipal agricultural production-PAM/IBGE |
| Technology    | renmiOT  | scalar | independent | Maize yield                         | OT         | 2036* | kg/ha       | 45% increase in maize yield (2017)                                                      | Municipal agricultural production-PAM/IBGE |
| Technology    | renmiPT  | scalar | independent | Maize yield                         | PT         | 2036* | kg/ha       | 15% increase in maize yield (2017)                                                      | Municipal agricultural production-PAM/IBGE |
| Technology    | renso_02 | scalar | independent | Soybean yield                       | BAU        | 2002  | kg/ha       | Average soybean yield                                                                   | Municipal agricultural production-PAM/IBGE |
| Technology    | renso_17 | scalar | independent | Soybean yield                       | BAU,OT, PT | 2017  | kg/ha       | Average soybean yield                                                                   | Municipal agricultural production-PAM/IBGE |
| Technology    | rensoOT  | scalar | independent | Soybean yield                       | OT         | 2036* | kg/ha       | 53% increase in soybean yield (2017)                                                    | Municipal agricultural production-PAM/IBGE |
| Technology    | rensoPT  | scalar | independent | Soybean yield                       | PT         | 2036* | kg/ha       | 17.5% increase in soybean yield (2017)                                                  | Municipal agricultural production-PAM/IBGE |
| Technology    | renfe_02 | scalar | independent | Bean yield                          | BAU,OT, PT | 2002  | kg/ha       | Average bean yield                                                                      | Municipal agricultural production-PAM/IBGE |
| Technology    | renfe_17 | scalar | independent | Bean yield                          | BAU,OT, PT | 2017  | kg/ha       | Average bean yield                                                                      | Municipal agricultural production-PAM/IBGE |
| Technology    | renfu_02 | scalar | independent | Tobacco yield                       | BAU,OT, PT | 2002  | kg/ha       | Average yield for tobacco                                                               | Municipal agricultural production-PAM/IBGE |
| Technology    | renfu_17 | scalar | independent | Tobacco yield                       | BAU,OT, PT | 2017  | kg/ha       | Average yield for tobacco                                                               | Municipal agricultural production-PAM/IBGE |
| Technology    | agrot_06 | scalar | independent | Use of agrochemicals                | BAU,OT, PT | 2006  | %           | Rural establishments that use agrochemicals                                             | Agricultural Census/IBGE                   |
| Technology    | agrot_17 | scalar | independent | Use of agrochemicals                | BAU,OT, PT | 2017  | %           | Rural establishments that use agrochemicals                                             | Agricultural Census/IBGE                   |
| Technology    | mecan_06 | scalar | independent | Mechanization in the rural property | BAU,OT, PT | 2006  | index       | Level of mechanization of rural property (number of tractors/area occupied by           | Agricultural Census/IBGE                   |

|             |          |        |             |                                     |            |       |         |                                                                                                                                                               |                                                    |
|-------------|----------|--------|-------------|-------------------------------------|------------|-------|---------|---------------------------------------------------------------------------------------------------------------------------------------------------------------|----------------------------------------------------|
| Technology  | mecan_17 | scalar | independent | Mechanization in the rural property | BAU,OT, PT | 2017  | index   | Level of mechanization of rural property (number of tractors/area occupied by Agricultural establishments that received technical orientation from government | Agricultural Census/IBGE                           |
| Technology  | ortec_06 | scalar | independent | Technical orientation               | BAU,OT, PT | 2006  | %       | Agricultural establishments that received technical orientation from government                                                                               | Agricultural Census/IBGE                           |
| Technology  | ortec_17 | scalar | independent | Technical orientation               | BAU,OT, PT | 2017  | %       | Agricultural establishments that received technical orientation from government                                                                               | Agricultural Census/IBGE                           |
| Demographic | depop_00 | scalar | independent | Population density                  | BAU,OT, PT | 2000  | density | Number of inhabitants in the municipality/area of the municipality                                                                                            | Population estimate/IBGE e Demographic Census/IBGE |
| Demographic | depop_18 | scalar | independent | Population density                  | BAU,OT, PT | 2018  | density | Number of inhabitants in the municipality/area of the municipality                                                                                            | Population estimate/IBGE e Demographic Census/IBGE |
| Demographic | txrur_00 | scalar | independent | Rural population                    | BAU, OT    | 2000  | %       | Rural population in relation to the total population                                                                                                          | Demographic Census/IBGE                            |
| Demographic | txrur_10 | scalar | independent | Rural population                    | BAU,OT, PT | 2010  | %       | Rural population in relation to the total population                                                                                                          | Demographic Census/IBGE                            |
| Demographic | txrurPT  | scalar | independent | Rural population                    | PT         | 2036* | %       | 20% reduction in rural population (2010)                                                                                                                      | Demographic Census/IBGE                            |

\*2036 - Scenario for the year 2036, as per analyzed/observed period of 18 years of data

\*\*PRONAF - Programa Nacional de Fortalecimento da Agricultura Familiar (national program for strengthening family agriculture)

BAU - business as usual scenario

OT - optimistic scenario

PT - pessimistic scenario
