# Supplementary material
Source: MDPI journal article supplement (https://www.mdpi.com/2073-445X/12/1/181)
Supplement: s1 [file s1]

| A1                   |                       | A2                   |                       | A3                   |                       | B1                   |                       | B2                   |                       | B3                   |                       |
|----------------------|-----------------------|----------------------|-----------------------|----------------------|-----------------------|----------------------|-----------------------|----------------------|-----------------------|----------------------|-----------------------|
| Independent Variable | Normalized Importance |
| USO00XR              | 100,0%                |
| SOLOS                | 44,8%                 | SOLOS                | 38,5%                 | SOLOS                | 44,8%                 | SOLOS                | 43,8%                 | ESTR_OSM             | 51,1%                 | ESTR_OSM             | 49,5%                 |
| ESTR_OSM             | 31,6%                 | ESTR_OSM             | 38,2%                 | ESTR_OSM             | 43,5%                 | ESTR_OSM             | 30,2%                 | SOLOS                | 38,6%                 | SOLOS                | 40,3%                 |
| TPI                  | 30,1%                 | TPI                  | 26,1%                 | TPI                  | 24,9%                 | TPI                  | 23,6%                 | TPI                  | 23,8%                 | TPI                  | 26,9%                 |
| REND_A_10            | 21,9%                 | INDGE_06             | 19,3%                 | FIPRO_17             | 21,3%                 | AGROT_17             | 20,8%                 | EMPCO_06             | 21,4%                 | MDE                  | 22,6%                 |
| TERRA_00             | 20,8%                 | AGROT_17             | 18,7%                 | VABAG_02             | 21,2%                 | ORTEC_17             | 20,4%                 | MDE                  | 20,9%                 | TERRA_00             | 21,8%                 |
| EFETB_18             | 20,3%                 | TERRA_00             | 18,7%                 | PIBCAPT              | 20,2%                 | TERRA_00             | 19,4%                 | TERRA_00             | 19,9%                 | EFETB_18             | 17,4%                 |
| INDGE_06             | 19,8%                 | EFETB_18             | 16,3%                 | TERRA_18             | 19,2%                 | PIBCA_17             | 18,6%                 | EFETS_18             | 17,2%                 | AGROT_17             | 16,6%                 |
| TXRUR_00             | 19,0%                 | REND_A_10            | 15,5%                 | AREES_17             | 18,0%                 | RENFU_02             | 18,3%                 | VABAG_17             | 17,0%                 | RENMI_17             | 16,6%                 |
| EFETG_00             | 18,7%                 | RENMI_17             | 15,3%                 | EFETS_18             | 17,9%                 | EMPAG_06             | 18,1%                 | RENFU_17             | 16,8%                 | TXRUR_10             | 15,4%                 |
| AGROT_17             | 18,0%                 | FIPRO_17             | 15,3%                 | INDGE_06             | 17,6%                 | EFETB_18             | 18,0%                 | PIBCA_17             | 16,2%                 | VABAG_17             | 15,3%                 |
| MECAN_17             | 18,0%                 | MDE                  | 14,9%                 | ESCPS_17             | 17,2%                 | INDGE_18             | 17,9%                 | RENMIOT              | 15,4%                 | VLLEI_17             | 15,2%                 |
| TXRUR_10             | 17,7%                 | TXRUR_00             | 14,7%                 | AGRIF_17             | 16,8%                 | TXRUR_00             | 17,8%                 | EFETG_18             | 15,3%                 | EMPCO_18             | 14,8%                 |
| AGRIF_06             | 17,2%                 | AREES_17             | 14,4%                 | RENSOPT              | 16,7%                 | AREES_06             | 17,6%                 | AREES_06             | 15,0%                 | ORTEC_17             | 14,7%                 |
| ORTEC_06             | 16,5%                 | PRECIP               | 13,8%                 | RENMI_17             | 16,0%                 | MDE                  | 17,2%                 | MAD_18               | 14,9%                 | FIPRO_06             | 14,2%                 |
| PRECIP               | 16,4%                 | REND_A_00            | 13,5%                 | EMPCO_18             | 16,0%                 | VABAG_17             | 17,2%                 | TRABP_17             | 14,9%                 | EFETG_00             | 14,1%                 |
| FIPRO_06             | 15,7%                 | PIBCAOT              | 12,9%                 | RENSO_17             | 15,7%                 | ESCPS_06             | 17,1%                 | EFETB_18             | 14,8%                 | IDH10X               | 13,6%                 |
| RENSO_02             | 15,6%                 | MECAN_17             | 12,8%                 | PRECIPPT             | 15,2%                 | RENSO_17             | 16,9%                 | RENMI_17             | 14,8%                 | EFETB_00             | 13,0%                 |
| AREES_17             | 15,4%                 | EMPIN_18             | 12,7%                 | RENFU_17             | 15,0%                 | TRABP_06             | 16,9%                 | MECAN_06             | 14,5%                 | VABAG_02             | 13,0%                 |
| RENMI_02             | 15,4%                 | EFETG_00             | 12,5%                 | MECAN_17             | 14,6%                 | MAD_00               | 16,7%                 | MAD_00               | 14,0%                 | ORTEC_06             | 12,9%                 |
| EFETG_18             | 14,6%                 | ORTEC_17             | 12,1%                 | PIBCA_17             | 14,5%                 | RENMI_02             | 16,4%                 | TRABP_06             | 13,9%                 | PIBCA_17             | 12,7%                 |
| IDH00X               | 14,6%                 | INDGE_18             | 12,0%                 | VLLEI_17             | 14,4%                 | RENSO_02             | 16,1%                 | MECAN_17             | 13,7%                 | EFETS_18             | 12,6%                 |
| REND_A_00            | 14,5%                 | AGRIF_06             | 11,8%                 | ESCPS_06             | 14,2%                 | INDGE_06             | 15,6%                 | RENFU_02             | 13,5%                 | AGRIF_17             | 12,5%                 |
| EMPIN_18             | 14,3%                 | VLLEI_17             | 11,8%                 | EFETS_00             | 14,0%                 | AGROT_06             | 15,5%                 | TERRA_18             | 13,2%                 | FIPRO_17             | 12,5%                 |
| TEMP                 | 14,2%                 | EFETG_18             | 11,2%                 | REND_A_00            | 14,0%                 | EFETS_18             | 15,3%                 | IDH10X               | 13,1%                 | PRECIPPT             | 12,3%                 |
| AGRIF_17             | 13,9%                 | VLLEI_02             | 11,1%                 | TERRA_00             | 13,6%                 | EMPCO_06             | 14,5%                 | TEMP                 | 13,0%                 | IDH00X               | 12,2%                 |
| TERRA_18             | 13,8%                 | ORTEC_06             | 11,1%                 | EMPIN_06             | 13,3%                 | IDADP_06             | 14,5%                 | AGROT_06             | 13,0%                 | RENFU_02             | 12,1%                 |
| VLLEI_02             | 13,7%                 | EMPIN_06             | 11,1%                 | TXRURPT              | 13,3%                 | DEPOP_18             | 14,4%                 | EMPCO_18             | 12,7%                 | DEPOP_00             | 11,7%                 |
| DEPOP_18             | 13,4%                 | RENFU_02             | 11,1%                 | TXRUR_10             | 13,3%                 | MECAN_17             | 14,3%                 | AGRIF_06             | 12,4%                 | MECAN_17             | 11,6%                 |

|          |       |          |       |          |       |          |       |          |       |          |       |
|----------|-------|----------|-------|----------|-------|----------|-------|----------|-------|----------|-------|
| PIBCA_17 | 13,4% | IDH00X   | 11,0% | MAD_18   | 13,2% | EFETB_00 | 14,3% | PIBCAOT  | 12,1% | TEMPPT   | 11,6% |
| MDE      | 13,3% | RENFU_17 | 10,9% | VABAG_17 | 13,2% | EMPCO_18 | 14,1% | DEPOP_18 | 11,8% | ESCPS_17 | 11,6% |
| EMPCO_06 | 13,3% | DEPOP_18 | 10,9% | DEPOP_00 | 13,1% | FIPRO_06 | 14,0% | ORTEC_06 | 11,6% | EMPCO_06 | 11,4% |
| IDADP_17 | 13,2% | RENFE_17 | 10,8% | MECAN_06 | 13,1% | PIBCA_02 | 13,8% | RENDA_00 | 11,5% | EFETS_00 | 11,4% |
| MAD_18   | 13,1% | MAD_18   | 10,7% | AREES_06 | 12,9% | IDH10X   | 13,7% | EFETS_00 | 11,5% | INDGE_18 | 11,3% |
| INDGE_18 | 12,9% | ESCPS_06 | 10,6% | RENFU_02 | 12,9% | RENFE_17 | 13,6% | INDGE_06 | 11,4% | RENSO_17 | 11,3% |
| RENFU_02 | 12,5% | IDADP_17 | 10,5% | TRABP_17 | 12,9% | VLLEI_17 | 13,5% | EFETB_00 | 11,3% | DEPOP_18 | 11,2% |
| TRABP_06 | 12,3% | AGROV_17 | 10,3% | IDH10X   | 12,4% | EFETS_00 | 13,3% | FIPRO_17 | 11,3% | RENSOPT  | 11,1% |
| VLLEI_17 | 12,3% | MECAN_06 | 10,3% | ORTEC_06 | 12,3% | RENDA_10 | 12,7% | TXRUR_10 | 11,3% | RENDA_10 | 10,9% |
| DEPOP_00 | 12,1% | TRABP_06 | 10,1% | DEPOP_18 | 12,3% | EMPIN_06 | 12,7% | AGROT_17 | 11,3% | MECAN_06 | 10,8% |
| EFETS_18 | 12,0% | FIPROOT  | 10,0% | EMPIN_18 | 11,8% | FIPRO_17 | 12,5% | AREES_17 | 11,2% | RENMIPT  | 10,8% |
| EFETS_00 | 11,4% | EFETS_18 | 9,9%  | AGRIF_06 | 11,6% | ESCPS_17 | 12,3% | TXRUR_00 | 11,2% | AREES_17 | 10,6% |
| VABAG_17 | 11,3% | TERRA_18 | 9,9%  | FIPRO_06 | 11,6% | RENFU_17 | 12,3% | EMPIN_06 | 11,1% | AGROV_17 | 10,5% |
| RENMI_17 | 11,2% | PIBCA_17 | 9,9%  | AGROT_06 | 11,5% | AGRIF_06 | 12,1% | VLLEI_02 | 11,1% | EMPIN_18 | 10,3% |
| VABAG_02 | 10,6% | VABAG_02 | 9,9%  | ORTEC_17 | 11,4% | TERRA_18 | 12,1% | DEPOP_00 | 11,1% | MAD_00   | 10,3% |
| RENFU_17 | 10,5% | EMPCO_06 | 9,8%  | RENFE_17 | 11,3% | TEMP     | 12,1% | VABAG_02 | 11,0% | EMPAG_06 | 10,3% |
| AGROV_17 | 10,2% | TXRUR_10 | 9,7%  | MAD_00   | 11,1% | AGROV_06 | 12,0% | FIPROOT  | 10,2% | IDADPPT  | 10,2% |
| AGROV_06 | 10,2% | AGRIF_17 | 9,7%  | AGROVPT  | 11,0% | MECAN_06 | 11,4% | IDADP_17 | 9,8%  | TRABP_17 | 10,1% |
| EMPIN_06 | 10,2% | RENMIOT  | 9,6%  | EMPCO_06 | 11,0% | AREES_17 | 11,1% | PRECIP   | 9,8%  | ESCPS_06 | 10,0% |
| PIBCA_02 | 10,1% | RENFE_02 | 9,2%  | EMPAG_18 | 10,9% | PRECIP   | 11,1% | ORTEC_17 | 9,7%  | RENDA_00 | 10,0% |
| RENFE_02 | 9,9%  | VABAG_17 | 9,2%  | IDADPPT  | 10,9% | DEPOP_00 | 11,0% | INDGE_18 | 9,7%  | EFETG_18 | 9,7%  |
| ORTEC_17 | 9,9%  | TEMP     | 9,1%  | AGROT_17 | 10,9% | EMPAG_18 | 11,0% | VLLEI_17 | 9,6%  | AGRIF_06 | 9,2%  |
| FIPRO_17 | 9,8%  | MAD_00   | 8,7%  | IDADP_17 | 10,1% | AGRIF_17 | 11,0% | EMPAG_18 | 9,5%  | AGROT_06 | 9,0%  |
| ESCPS_06 | 9,6%  | IDH10X   | 8,6%  | EMPAG_06 | 10,0% | IDH00X   | 11,0% | IDADP_06 | 8,8%  | VLLEI_02 | 9,0%  |
| RENSO_17 | 9,6%  | ESCPS_17 | 8,6%  | RENDA_10 | 9,9%  | RENDA_00 | 10,9% | EMPIN_18 | 8,7%  | TXRURPT  | 8,9%  |
| RENFE_17 | 9,5%  | EFETB_00 | 8,4%  | AGROV_17 | 9,8%  | MAD_18   | 10,7% | ESCPS_17 | 8,7%  | TRABP_06 | 8,9%  |
| EMPAG_18 | 9,4%  | EMPAG_06 | 8,4%  | IDH00X   | 9,8%  | EFETG_18 | 10,6% | RENDA_10 | 8,7%  | EMPIN_06 | 8,4%  |
| IDADP_06 | 9,2%  | RENSO_17 | 8,3%  | MDE      | 9,7%  | EFETG_00 | 10,2% | IDH00X   | 8,7%  | MAD_18   | 8,4%  |
| EFETB_00 | 9,2%  | TRABP_17 | 8,0%  | EFETB_18 | 9,2%  | ORTEC_06 | 10,1% | RENFE_17 | 8,6%  | TERRA_18 | 8,3%  |
| IDH10X   | 9,0%  | EFETS_00 | 7,9%  | RENMIPT  | 9,0%  | VABAG_02 | 10,0% | EMPAG_06 | 8,4%  | RENFU_17 | 8,3%  |
| MECAN_06 | 8,8%  | AGROT_06 | 7,8%  | EFETG_00 | 8,8%  | TXRUR_10 | 9,8%  | RENSOOT  | 8,3%  | INDGE_06 | 8,2%  |
| TRABP_17 | 8,4%  | AGROVOT  | 7,6%  | TRABP_06 | 8,6%  | VLLEI_02 | 9,6%  | ESCPS_06 | 8,2%  | IDADP_17 | 8,1%  |
| EMPCO_18 | 8,4%  | EMPAG_18 | 7,4%  | EFETB_00 | 8,6%  | EMPIN_18 | 9,2%  | EFETG_00 | 8,0%  | EMPAG_18 | 8,0%  |

|          |      |          |      |          |      |          |      |          |      |          |      |
|----------|------|----------|------|----------|------|----------|------|----------|------|----------|------|
| AREES_06 | 8,3% | EMPCO_18 | 7,4% | VLLEI_02 | 8,6% | RENMI_17 | 9,1% | AGROV_17 | 8,0% | PIBCAPT  | 7,4% |
| ESCPS_17 | 8,2% | RENROOT  | 7,2% | RENFE_02 | 8,5% | RENFE_02 | 9,0% | AGRIF_17 | 7,4% | RENFE_02 | 7,3% |
| AGROT_06 | 8,0% | AREES_06 | 7,2% | TEMPPT   | 8,0% | AGROV_17 | 8,5% | AGROVOT  | 7,4% | AREES_06 | 7,1% |
| MAD_00   | 7,4% | DEPOP_00 | 7,0% | INDGE_18 | 7,6% | IDADP_17 | 7,5% | RENFE_02 | 7,4% | AGROVPT  | 7,0% |
| EMPAG_06 | 6,4% | IDADP_06 | 6,5% | EFETG_18 | 7,5% | TRABP_17 | 7,2% | RENTO_17 | 7,0% | RENFE_17 | 6,8% |
