# Supplementary material
Source: MDPI journal article supplement (https://www.mdpi.com/2073-445X/12/1/181)
Supplement: s1 [file s1]

| Predictive Scenarios  |            |         |                  |         |                   |         |
|-----------------------|------------|---------|------------------|---------|-------------------|---------|
| Scenarios             | BAU        |         | Optimistic       |         | Pessimistic       |         |
|                       | A1         | B1      | A2               | B2      | A3                | B3      |
| Actions               | Do nothing | AreaNat | Do nothing       | AreaNat | Do nothing        | AreaNat |
| Independent variables | temp       |         | temp             |         | temp (+4°C)       |         |
|                       | precip     |         | precip           |         | precip (+84mm)    |         |
|                       | solos      |         | solos            |         | solos             |         |
|                       | tpi        |         | tpi              |         | tpi               |         |
|                       | mde        |         | mde              |         | mde               |         |
|                       | estrad_osm |         | estrad_osm       |         | estrad_osm        |         |
|                       | agrov_06   |         | agrov_17         |         | agrov_17          |         |
|                       | agrov_17   |         | agrov_17 (+55%)  |         | agrov_17 (+18%)   |         |
|                       | efetb_00   |         | efetb_00         |         | efetb_00          |         |
|                       | efetb_18   |         | efetb_18         |         | efetb_18          |         |
|                       | efets_00   |         | efets_00         |         | efets_00          |         |
|                       | efets_18   |         | efets_18         |         | efets_18          |         |
|                       | efetg_00   |         | efetg_00         |         | efetg_00          |         |
|                       | efetg_18   |         | efetg_18         |         | efetg_18          |         |
|                       | empco_06   |         | empco_06         |         | empco_06          |         |
|                       | empco_18   |         | empco_18         |         | empco_18          |         |
|                       | empin_06   |         | empin_06         |         | empin_06          |         |
|                       | empin_18   |         | empin_18         |         | empin_18          |         |
|                       | empag_06   |         | empag_06         |         | empag_06          |         |
|                       | empag_18   |         | empag_18         |         | empag_18          |         |
|                       | fipro_06   |         | fipro_17         |         | fipro_06          |         |
|                       | fipro_17   |         | fipro_17 (+0.3%) |         | fipro_17          |         |
|                       | indge_06   |         | indge_06         |         | indge_06          |         |
|                       | indge_18   |         | indge_18         |         | indge_18          |         |
|                       | pibca_02   |         | pibca_17         |         | pibca_17          |         |
|                       | pibca_17   |         | pibca_17 (+54%)  |         | pibca_17 (+13.5%) |         |
|                       | terra_00   |         | terra_00         |         | terra_00          |         |

|  |          |                 |                   |
|--|----------|-----------------|-------------------|
|  | terra_18 | terra_18        | terra_18          |
|  | renda_00 | renda_00        | renda_00          |
|  | renda_10 | renda_10        | renda_10          |
|  | mad_00   | mad_00          | mad_00            |
|  | mad_18   | mad_18          | mad_18            |
|  | vabag_00 | vabag_00        | vabag_00          |
|  | vabag_17 | vabag_17        | vabag_17          |
|  | vllei_00 | vllei_00        | vllei_00          |
|  | vllei_17 | vllei_17        | vllei_17          |
|  | agrif_06 | agrif_06        | agrif_06          |
|  | agrif_17 | agrif_17        | agrif_17          |
|  | escps_06 | escps_06        | escps_06          |
|  | escps_17 | escps_17        | escps_17          |
|  | idadp_06 | idadp_06        | idadp_17          |
|  | idadp_17 | idadp_17        | idadp_17 (+70%)   |
|  | idhm_00  | idhm_00         | idhm_00           |
|  | idhm_10  | idhm_10         | idhm_10           |
|  | trabp_06 | trabp_06        | trabp_06          |
|  | trabp_17 | trabp_17        | trabp_17          |
|  | arees_06 | arees_06        | arees_06          |
|  | arees_17 | arees_17        | arees_17          |
|  | renmi_02 | renmi_17        | renmi_17          |
|  | renmi_17 | renmi_17 (+45%) | renmi_17 (+15%)   |
|  | renso_02 | renso_17        | renso_17          |
|  | renso_17 | renso_17 (+53%) | renso_17 (+17.5%) |
|  | renfe_02 | renfe_02        | renfe_02          |
|  | renfe_17 | renfe_17        | renfe_17          |
|  | renfu_02 | renfu_02        | renfu_02          |
|  | renfu_17 | renfu_17        | renfu_17          |
|  | agrot_06 | agrot_06        | agrot_06          |
|  | agrot_17 | agrot_17        | agrot_17          |

|                     |                                                                                                          |         |                                                                                                          |         |                                                                                                                 |         |
|---------------------|----------------------------------------------------------------------------------------------------------|---------|----------------------------------------------------------------------------------------------------------|---------|-----------------------------------------------------------------------------------------------------------------|---------|
|                     | mecan_06<br>mecan_17<br>ortec_06<br>ortec_17<br>depop_00<br>depop_18<br>txrur_00<br>txrur_10<br>LULC2000 |         | mecan_06<br>mecan_17<br>ortec_06<br>ortec_17<br>depop_00<br>depop_18<br>txrur_00<br>txrur_10<br>LULC2000 |         | mecan_06<br>mecan_17<br>ortec_06<br>ortec_17<br>depop_00<br>depop_18<br>txrur_10<br>txrur_10 (-20%)<br>LULC2000 |         |
| Dependent variables | LULC2018                                                                                                 | AreaNat | LULC2018                                                                                                 | AreaNat | LULC2018                                                                                                        | AreaNat |
