# Supplementary material
Source: MDPI journal article supplement (https://www.mdpi.com/2073-445X/12/1/181)
Supplement: s1 [file s1]

Archive with 3 entries (3 files):
- S1_variable description.pdf
- S2_scenarios building.pdf
- S3_sensitivity analysis.pdf
